# Supplementary material
Source: publisher site journal article supplement (https://www.dovepress.com/article/571566)
Supplement: Supplementary file 1 [file 571566_Supplementary_Table_S1_Search_Strategy.docx]

# Supplementary Table S1. Full electronic search strategies

| Database | Search strategy |
| --- | --- |
| PubMed (MEDLINE) | ("low back pain" OR "chronic low back pain" OR "back pain") AND (radiofrequency OR "radiofrequency ablation" OR RFA OR denervation) |
| Embase | ("low back pain" OR "chronic low back pain" OR "back pain") AND (radiofrequency OR "radiofrequency ablation" OR RFA OR denervation) |
| Cochrane Library and its integrated sources, including Embase, ICTRP, ClinicalTrials.gov, CINAHL, PubMed. | ("low back pain" OR "chronic low back pain" OR "back pain") AND (radiofrequency OR "radiofrequency ablation" OR RFA OR denervation) |
| ClinicalTrials.gov / ICTRP | Condition: low back pain; Intervention: radiofrequency ablation OR radiofrequency denervation |

Note: A single predefined search strategy was applied across all databases to ensure consistency. The strategy was entered identically across databases, without database-specific indexing terms. Full search strategies are presented to ensure transparency and reproducibility.
